# Supplementary material
Source: Springer Nature journal article supplement (https://www.springermedizin.de/resource/supplementary/13014_2007_90_MOESM7_ESM.pdf/9632898)

(a)

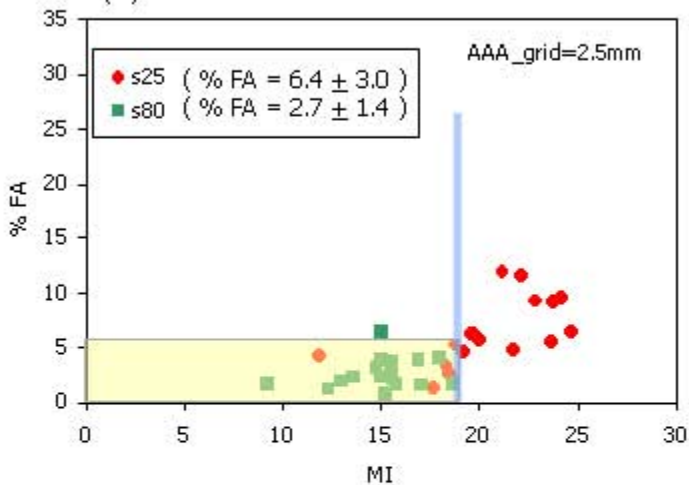

(b)

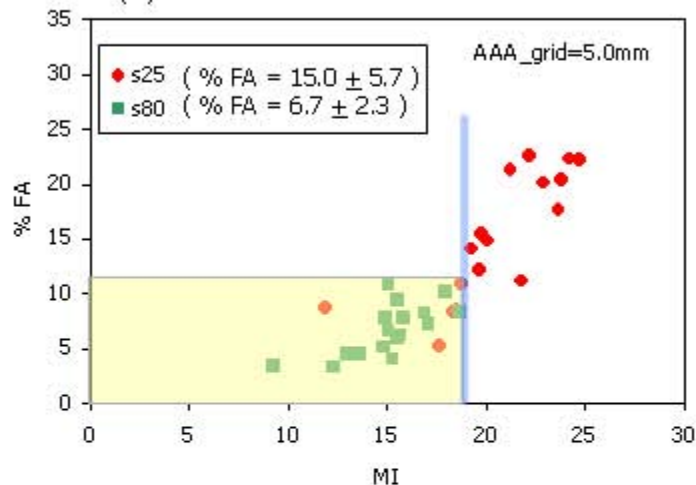

(c)

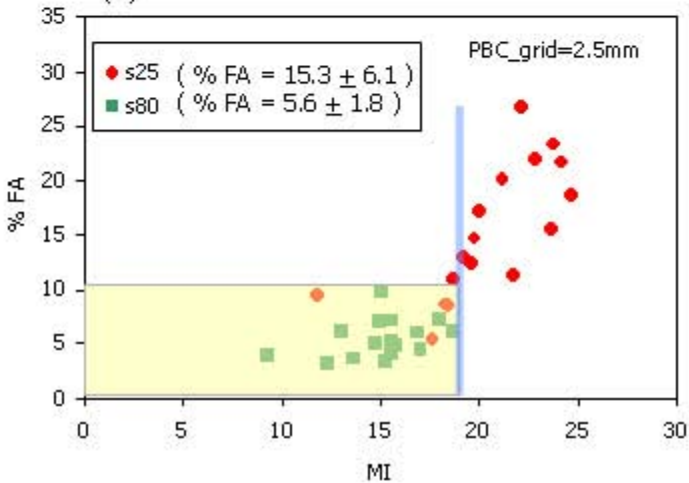

(d)

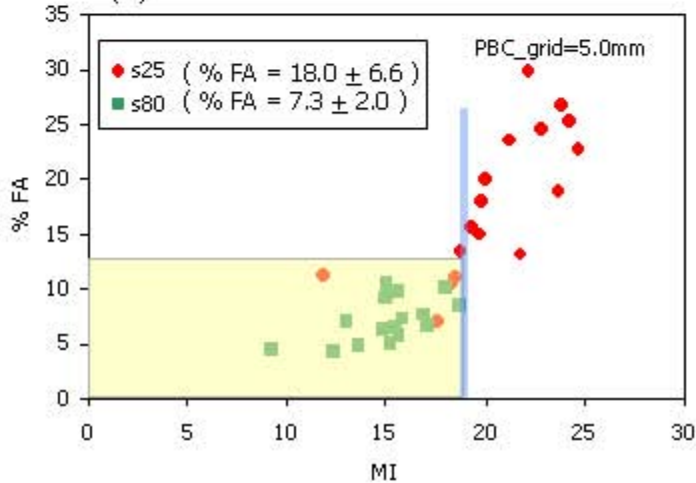

Supplement: MOESM7 [file 9632898]
